# Supplementary material
Source: publisher site journal article supplement (https://www.dovepress.com/article/282463)
Supplement: Supplementary file 1 [file get_supplementary_file.php]

## Supplementary material

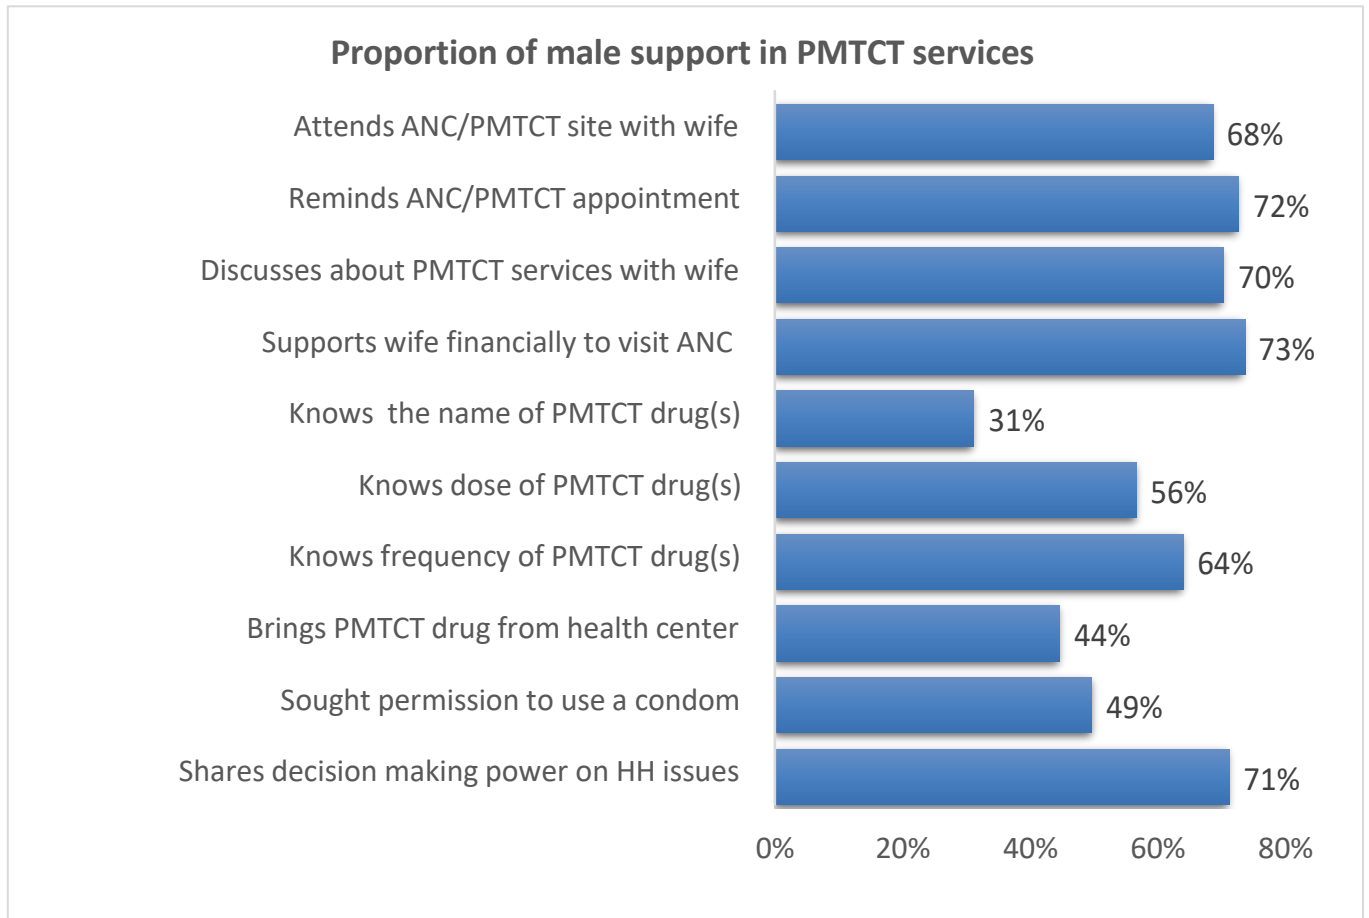

Figure S1: Male partner involvement/support in PMTCT option B+ care/services for HIV positive pregnant women, Ethiopia, 2018

Table S1: Knowledge of risk reductions/PMTCT services of mother to child transmission among HIV positive pregnant women in West Shawa, Ethiopia, 2018 (n=343)

| Knowledge on MTCT (PMTCT) (risk reduction)                                                                  | Response   |             |
|-------------------------------------------------------------------------------------------------------------|------------|-------------|
|                                                                                                             | True n (%) | False n (%) |
| Condom use during sex with an HIV infected partner can prevent HIV transmission                             | 325(94.8)  | 18(5.2)     |
| Seropositive women can transmit HIV to their babies during pregnancy, labor and delivery and breast feeding | 323(94.2)  | 20(5.8)     |
| HIV-positive women can reduce the risk of HIV transmission to their babies if they take PMTCT drugs         | 322(93.9)  | 21(6.1)     |
| Omitting to take some of the PMTCT drugs can affect effectiveness of PMTCT care and support                 | 270(78.7)  | 73(21.3)    |
| Adhering to ARV drugs can reduce the risk of opportunistic infections                                       | 306(89.2)  | 37(10.8)    |
| The support of the male partner during PMTCT care enhance adherence of mothers to PMTCT drugs               | 257(74.9)  | 86(25.1)    |

Table S2: Attitude towards PMTCT option B+ care among pregnant women attending PMTCT clinic in West Shawa, Ethiopia, 2018

| Variables                                                                                   | Dis-agreed<br>n (%) | Not sure<br>n (%) | Agreed<br>n (%) |
|---------------------------------------------------------------------------------------------|---------------------|-------------------|-----------------|
| It is tiresome to take PMTCT drugs every day                                                | 196(57.1)           | 1(0.3)            | 146(42.6)       |
| Taking PMTCT drugs benefits not only the mother but also the baby                           | 16(4.7)             | 2(0.6)            | 325(94.8)       |
| Starting ARV treatment earlier can help to improve the quality of life and survival better. | 24(7)               | 15(4.4)           | 304(88.6)       |
| Involving male partner increase effectiveness of PMTCT services                             | 36(10.5)            | 21(6.1)           | 286(83.4)       |
| I would not like to give birth taking PMTCT drugs                                           | 230(67)             | 10(2.9)           | 103(30)         |
| I don't recommend to have sex without condom                                                | 87(25.4)            | 12(3.5)           | 244(71.1)       |

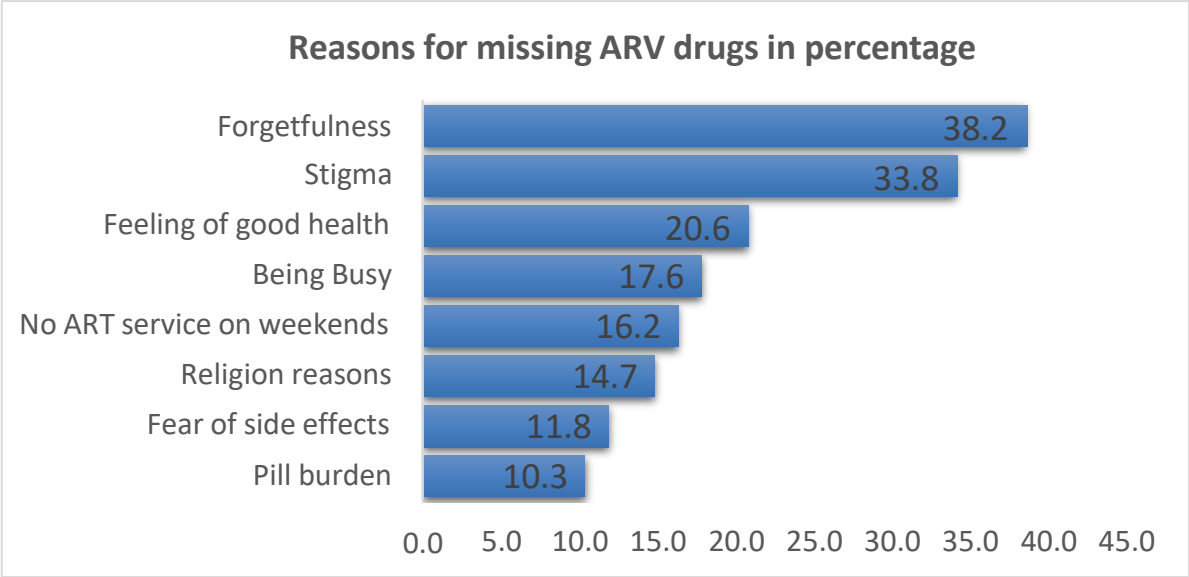

Figure S2: Main reasons for missing ARV drugs among pregnant women attending PMTCT clinics in West Shawa, Ethiopia, 2018
